# Supplementary material for: Coupling Effect of Non-Ignition Impact and Heat on the Decay of FOX-7
Source: MDPI journal article supplement (doi:10.3390/molecules27238255), 2022-11-26
Supplement: s1 [file s1]

# Coupling Effect of Non-Ignition Impact and Heat on the Decay of FOX-7

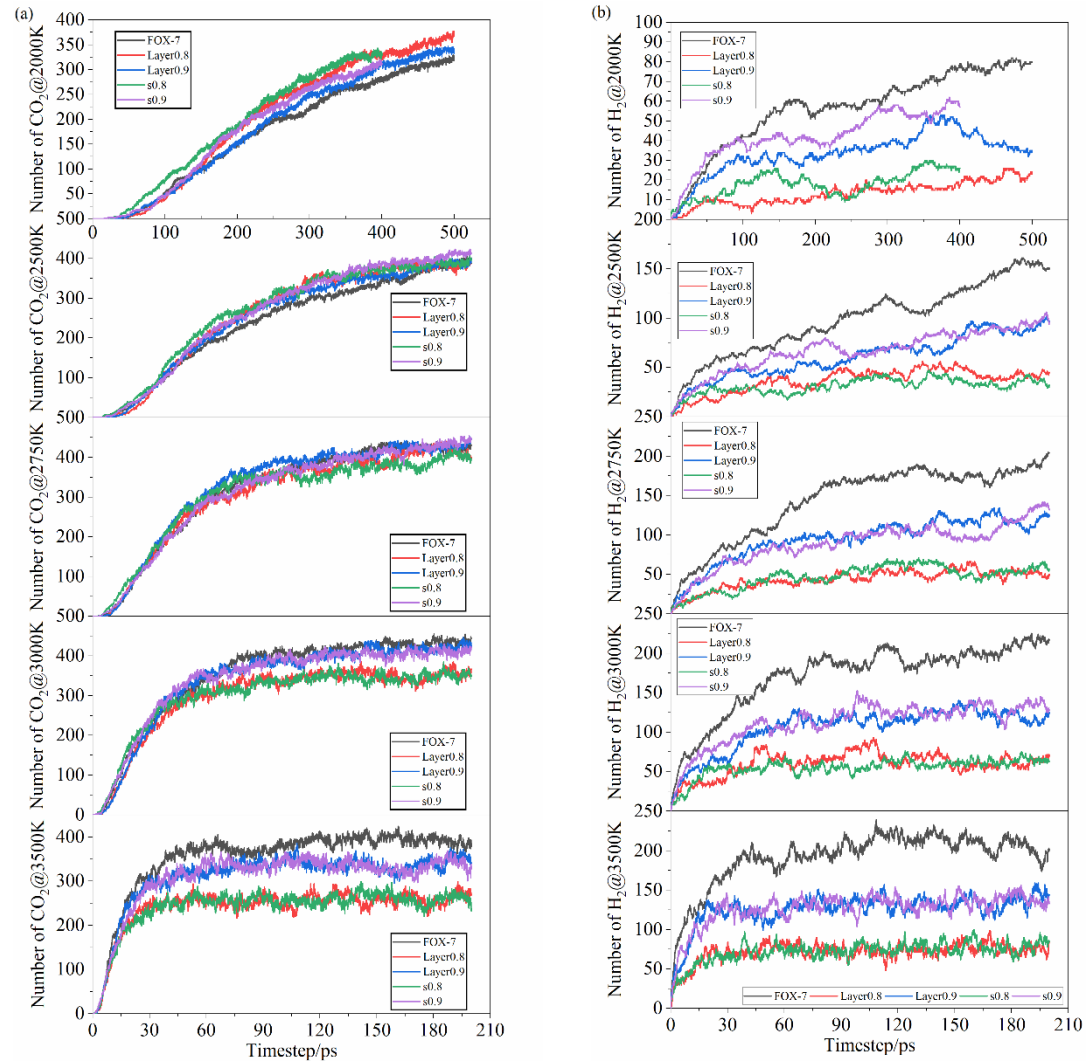

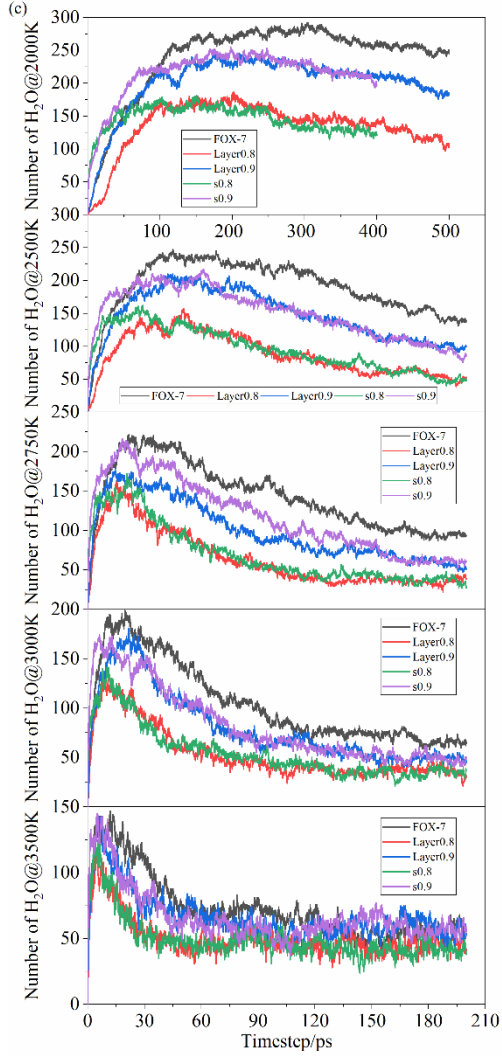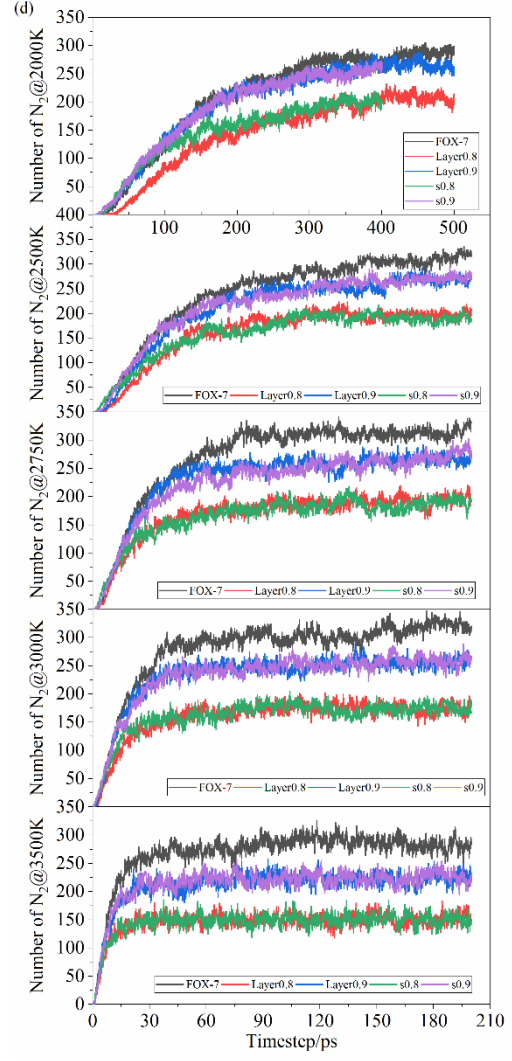

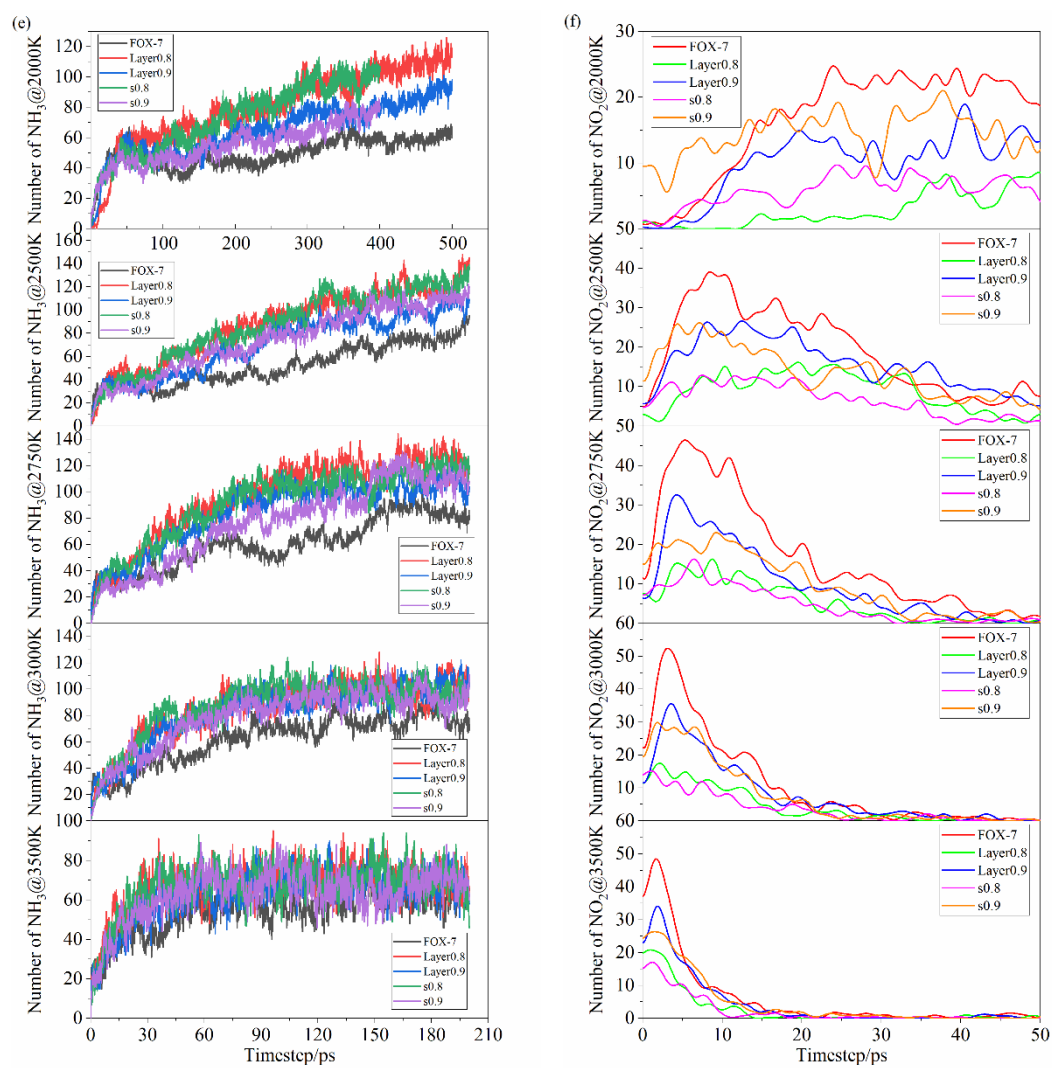

Figure S1 The evolution of the main related chemical species in all cases.

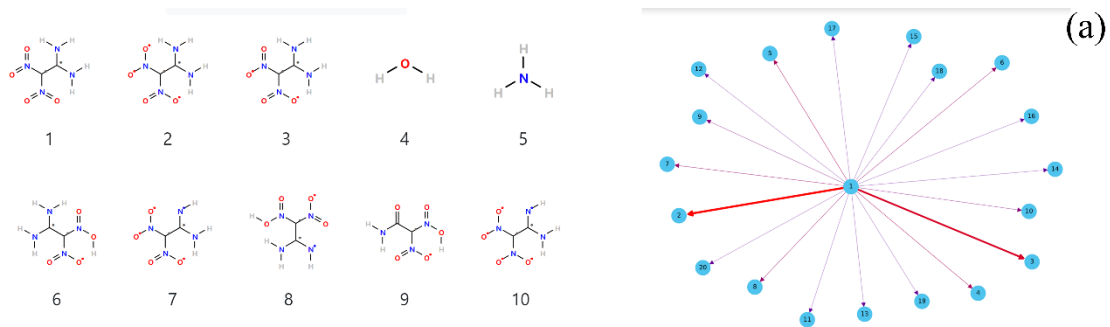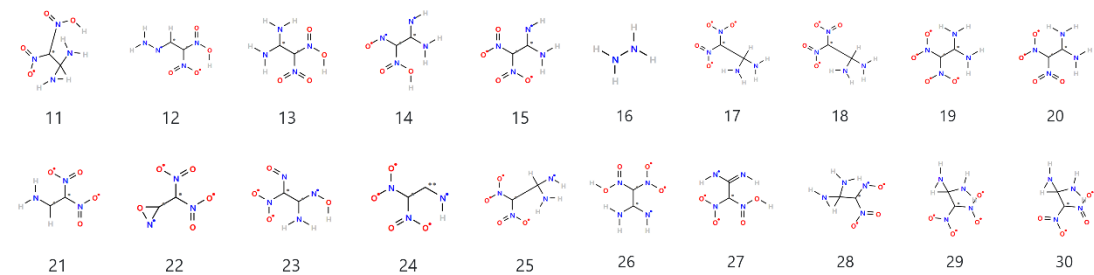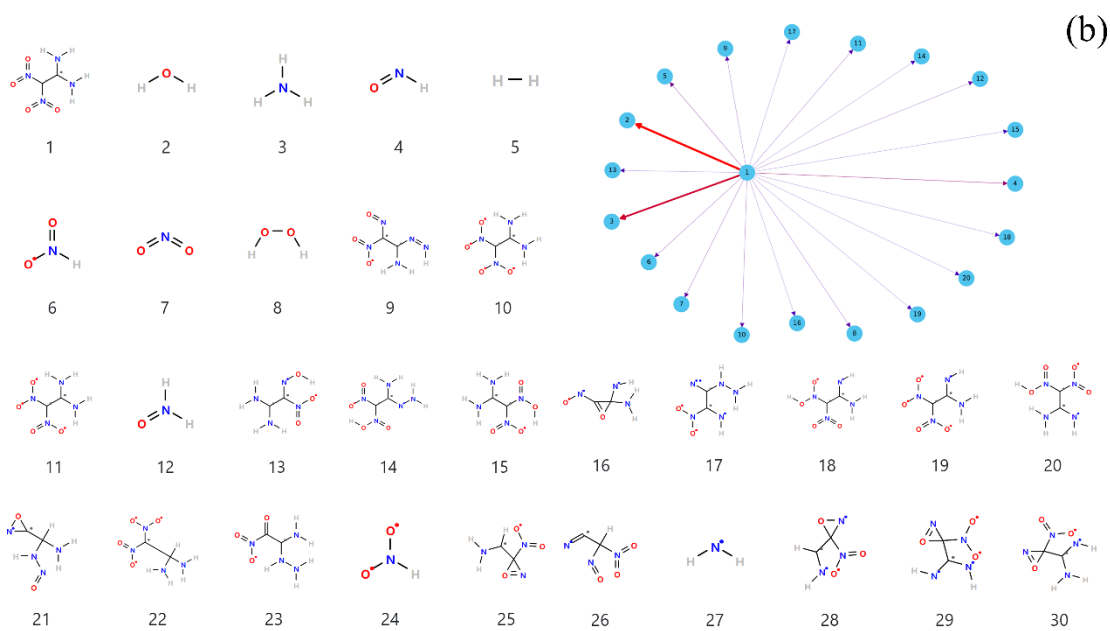

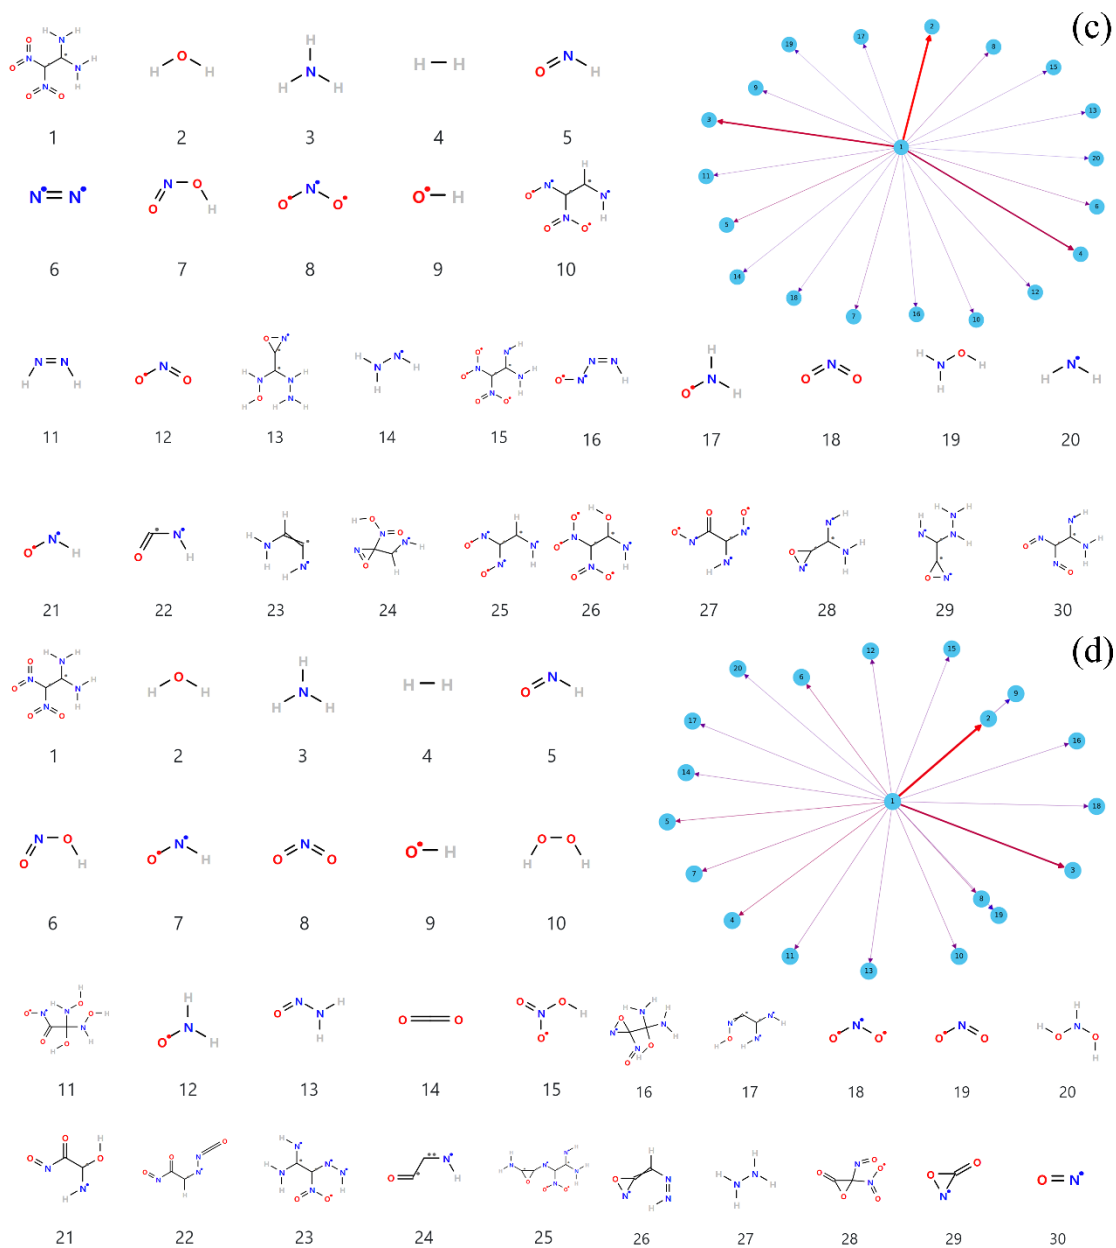

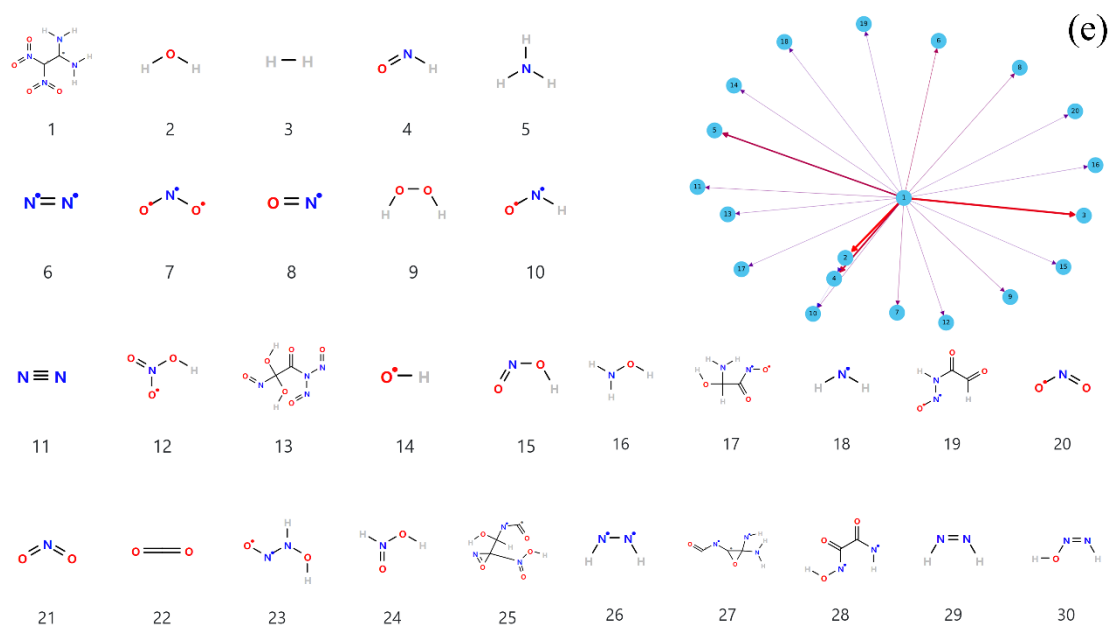

Figure S2. The initial reaction nets formed by the top 20 species under five temperatures.
